# Supplementary material
Source: PubMed Central journal article supplement (PMC6856626)

Fig. 1C

IP: FLAG-Stx16/Vti1a/Stx6

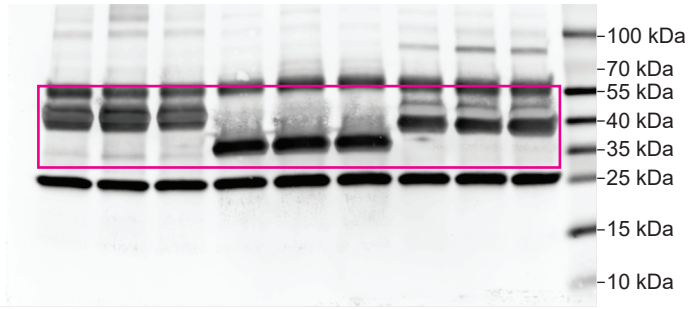

Input: FLAG-Stx16/Vti1a/Stx6

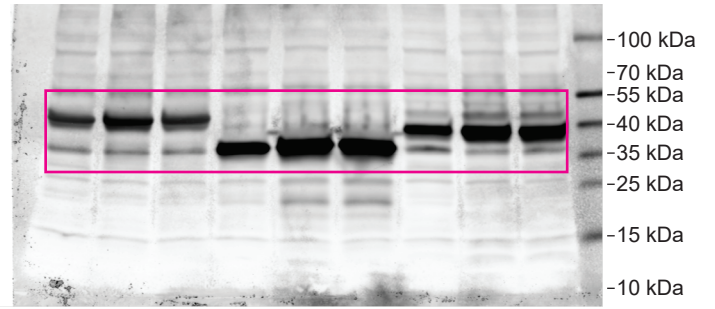

IP: EGFP-LC3B/GABARAP

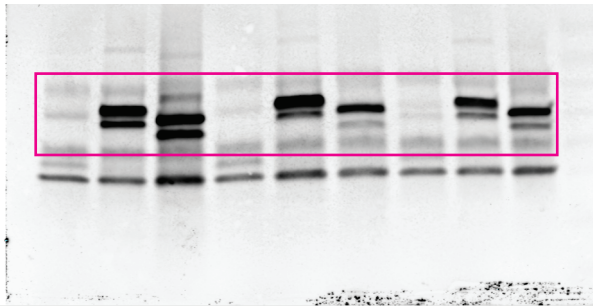

Input: EGFP-LC3B/GABARAP

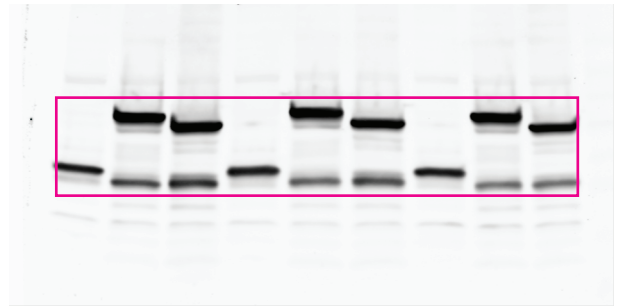

Supplement: EMBJ-38-e101994-s003.pdf [file EMBJ-38-e101994-s003.pdf]
